# Supplementary material for: Tripartite Motif Containing 11 Interacts with DUSP6 to Promote the Growth of Human Osteosarcoma Cells through Regulating ERK1/2 Pathway
Source: PubMed Central journal article supplement (PMC6948331; doi:10.1155/2019/9612125), 2019-12-25
Supplement: 9612125.f1.pdf [file 9612125.f1.pdf]

## Supplementary File1: Primer sequence information

### 1.1 Homo sapiens tripartite motif containing 11 (TRIM11), mRNA

NM\_145214.2

Primer F 5' CACCTAAGCTGCACAGTTCC 3'

Primer R 5' GGCTGCCTCCTAATTCTTCC 3'

Pos: 2008- 2192

Amplified product: Size: 185 bps

### 1.2 Homo sapiens dual specificity phosphatase 6 (DUSP6), transcript variant 1, mRNA

NM\_001946.4

Primer F 5' CGATGAACGATGCCTATGAC 3'

Primer R 5' CTGATGCTGCCAAGAGAAAC 3'

Pos: 1406- 1674

Amplified product: Size: 269 bps

### 1.3 Homo sapiens glyceraldehyde-3-phosphate dehydrogenase (GAPDH), transcript variant 2, mRNA

NM\_001256799.2

Primer F 5' AATCCCATCACCATCTTC 3'

Primer R 5' AGGCTGTTGTCATACTTC 3'

Pos: 436-653

Amplified product: Size: 218 bps

**Supplementary Table1: Homo sapiens tripartite motif containing 11 (TRIM11)****(NM\_145214.2) RNAi targeting locus information**

---

| RNAi Targeting Locus |                | Sequence            |
|----------------------|----------------|---------------------|
| Name                 | locus position |                     |
| siTRIM11-1           | 672-690        | GGAGAAGTCACTGGAGCAT |
| siTRIM11-2           | 708-726        | GGATGCGTTGCTGTTCCAA |
| siTRIM11-3           | 746-764        | GCGTCTTGTGGCAGAAGAT |

---

## Supplementary Table 2: The primary antibodies information

| Antibody name | Catalog  | Source     | Dilution factor |
|---------------|----------|------------|-----------------|
| TRIM11        | Ab111694 | Abcam, UK  | <u>1:2000</u>   |
| DUSP6         | Ab238512 | Abcam, UK  | <u>1:500</u>    |
| Bcl2          | Sc-492   | Santa, USA | <u>1:300</u>    |
| c-fos         | Ab184666 | Abcam, UK  | <u>1:1000</u>   |
| ERK1/2        | #9102    | CST, USA   | <u>1:1000</u>   |
| p-ERK1/2      | #9101    | CST, USA   | <u>1:1000</u>   |
| GAPDH         | #5174    | CST, USA   | <u>1/2000</u>   |
